# Supplementary material for: A lacuna in reticular chemistry: an unprecedented binodal (6,10)-connected network based on two distinct zinc clusters
Source: Royal Society of Chemistry journal article supplement (doi:10.1039/c0ce00582g), 2010-01-01
Supplement: c0ce00582g.pdf [file c0ce00582g.pdf]

## Supporting Information

### A lacuna in reticular chemistry: an unprecedented binodal (6,10)-connected network based on two distinct zinc clusters

Jie Qin, Chao Qin,\* Cui-Xia Wang, Huan Li, Ling Cui, Ting-Ting Li and Xin-Long Wang\*

*Key Laboratory of Polyoxometalates Science of Ministry of Education, Department of Chemistry, Northeast Normal University, Changchun, 130024, China.*

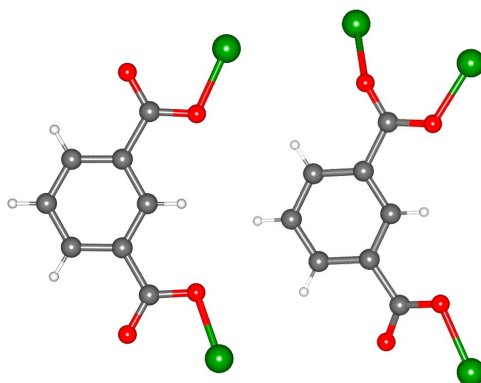

**Scheme S1** Carboxylate binding modes in **1**. Left: bis(monodentate), Right: monodentate-bidentate. Color code: C black; O red; Zn green.

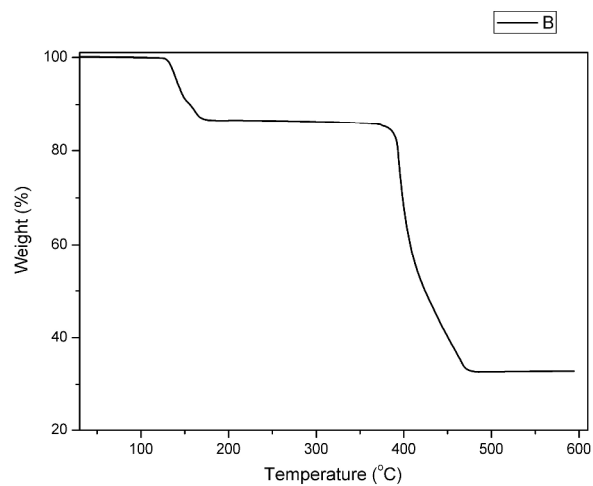

**Fig. S1** TG curve of **1**.

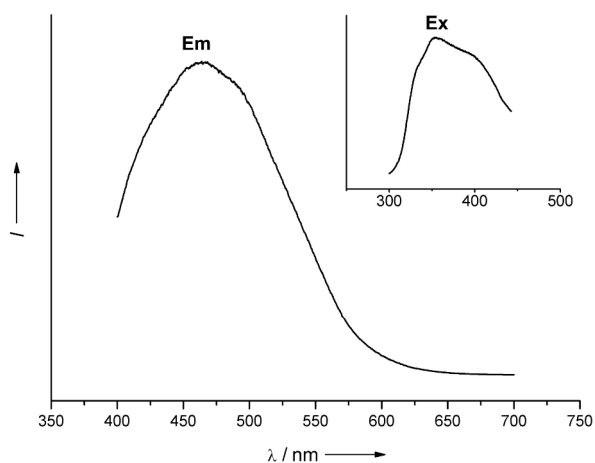

**Fig. S2** Photoluminescent spectrum of **1** in the solid state at room temperature. Ex = excitation, Em = emission.

**Highest symmetry group and coordinates in the relaxed cell:**

Ideal space group is  $C2/m$ .

Relaxed cell parameters: 1.60185 1.23649 1.56783 90.0000 102.5567 90.0000

Relaxed positions:

Node 2: 0.00000 0.50000 0.50000

Node 1: 0.00000 0.00000 0.00000

Edges:

0.00000 0.50000 0.50000 <-> 0.50000 0.00000 0.50000

0.00000 0.00000 0.00000 <-> 0.50000 0.00000 0.50000

0.00000 0.00000 0.00000 <-> 0.00000 0.50000 0.50000

Edge centers:

0.25000 0.25000 0.50000

0.25000 0.00000 0.25000

0.00000 0.25000 0.25000
